24 \*Corresponding author: [cmurdock@uga.edu](mailto:cmurdock@uga.edu) (CM)

25

## 26 **Abstract**

27           Temperature is a strong driver of vector-borne disease transmission. Yet, for emerging  
28 arboviruses we lack fundamental knowledge on the relationship between transmission and  
29 temperature. Current models rely on the untested assumption that Zika virus responds similarly  
30 to dengue virus, potentially limiting our ability to accurately predict the spread of Zika. We  
31 conducted experiments to estimate the thermal performance of Zika virus (ZIKV) in field-  
32 derived *Aedes aegypti* across eight constant temperatures. We observed strong, unimodal effects  
33 of temperature on vector competence, extrinsic incubation period, and mosquito survival. We  
34 used thermal responses of these traits to update an existing temperature-dependent model to infer  
35 temperature effects on ZIKV transmission. ZIKV transmission was optimized at 29°C, and had a  
36 thermal range of 22.7°C - 34.7°C. Thus, as temperatures move toward the predicted thermal  
37 optimum (29°C) due to climate change, urbanization, or seasonally, Zika could expand north and  
38 into longer seasons. In contrast, areas that are near the thermal optimum were predicted to  
39 experience a decrease in overall environmental suitability. We also demonstrate that the  
40 predicted thermal minimum for Zika transmission is 5°C warmer than that of dengue, and current  
41 global estimates on the environmental suitability for Zika are greatly over-predicting its possible  
42 range.

43

44

## 45 **Introduction**

46 Mosquito-borne viruses are an emerging threat impacting human health and well-being.  
47 Epidemics of dengue (DENV), chikungunya, and Zika (ZIKV) have spilled out of Africa to  
48 spread explosively throughout the world creating public health crises. Worldwide, an estimated  
49 3.9 billion people living within 120 countries are at risk [1]. In 2015-2016, ZIKV spread  
50 throughout the Americas including the continental U.S., resulting in over 360,000 suspected  
51 cases, with likely many more undetected [2]. With the rise of neurological disorders and birth  
52 defects, such as Guillain-Barré and congenital Zika virus syndrome [3, 4], ZIKV became widely  
53 feared and was declared a “public health emergency of international concern” by the World  
54 Health Organization in 2016 [5]. In spite of growing research efforts to develop new  
55 therapeutics, vaccines, and innovative mosquito control technologies, mitigating arbovirus  
56 disease spread still depends on conventional mosquito control methods and public education.  
57 Thus, substantial efforts have been made to predict who ZIKV will spread seasonally,  
58 geographically, and with the effects of climate change [e.g. 6, 7-9].

59 There are several key gaps that potentially affect our ability to predict, and ultimately,  
60 mitigate the factors that influence transmission risk and arbovirus emergence globally. First,  
61 current models predicting mosquito distributions or virus transmission are often limited by a  
62 relatively poor understanding of the relationships among mosquito vectors, pathogens, and the  
63 environment. There is substantial evidence that temperature variability is a key driver of disease  
64 transmission across diverse vector-borne pathogen systems [8, 10-15]. Mosquitoes are small  
65 ectothermic animals and their physiology [16-18], life history [8, 19], and vectorial capacity [10,  
66 20-22] exhibit unimodal responses to changes in temperature. Transmission depends in large part  
67 on the ability of mosquitoes to survive the extrinsic incubation period (EIP), become infectious,

68 and bite new hosts, so differential (unimodal) impacts of temperature on survival, vector  
69 competence, and EIP have highly nonlinear effects on transmission. Warmer temperatures do not  
70 necessarily translate into more infectious mosquitoes [8, 20, 23]. Second, current models often  
71 ignore the low quality and quantity of existing data. Even in systems that are fairly well-studied  
72 (e.g. *Plasmodium falciparum* and DENV), key parameters are often estimated from only a few  
73 studies. Finally, current transmission models often assume, with little justification, that the  
74 relationship between temperature and EIP is monotonic [24], or that the relationships between  
75 temperature, EIP, and vector competence of less-studied arboviruses (e.g. chikungunya and  
76 ZIKV) are similar to DENV [8, 9, 25].

77 To advance our fundamental scientific understanding of the relationship between  
78 temperature and ZIKV transmission, we conducted a series of experiments to estimate the  
79 thermal performance of ZIKV (vector competence, the extrinsic incubation rate, and the daily  
80 per capita mosquito mortality rate) in field-derived *Ae. aegypti* across eight different constant  
81 temperatures ranging from 16 - 38°C. We fit a series of nonlinear functions to estimate the  
82 thermal responses of the above traits. These thermal responses were incorporated into a  
83 temperature dependent basic reproductive number ( $R_0$ ) model developed for *Ae. aegypti* and  
84 DENV [14] to infer how temperature variation will impact ZIKV transmission.

85

## 86 **Methods**

87

### 88 **Experimental mosquito infections and forced salivations**

89 For details on virus culture and mosquito rearing, see supplementary information (Text  
90 S1). For each biological replicate, we separated 8,000 1 to 3-day-old females (field derived *Ae.*

91 *aegypti*, F4 generation) prior to ZIKV infection (Fig S1). Mosquitoes were kept in 64 oz. paper  
92 cups and provided with water, which was withdrawn 12 hours before feeding. We offered them  
93 either an infectious blood meal containing ZIKV at a final concentration of  $10^6$  PFU/mL or an  
94 uninfected, control blood meal. The blood meal was prepared by washing human blood three  
95 times in RPMI medium and the pelleted red blood cells (50%) were resuspended in 33% DMEM,  
96 20% FBS, 1% sucrose, and 5 mmol/L ATP. For the infectious blood meal, we mixed the blood  
97 mixture with ZIKV diluted in DMEM ( $2 \times 10^6$  PFU/mL) at a 1:1 ratio. Mosquitoes were blood-fed  
98 through a water-jacketed membrane feeder for 30 min, after which we randomly distributed  
99 2,000 ZIKV-exposed engorged mosquitoes and 2,000 unexposed blood-fed control mosquitoes  
100 into mesh-covered paper cups (250 mosquitoes per cup). We then placed one ZIKV-exposed and  
101 one control cup at each temperature treatment (Percival Scientific): 16°C, 20°C, 24°C, 28°C,  
102 32°C, 34°C, 36°C, and 38°C  $\pm$  0.5°C. Chambers were set to 80%  $\pm$  5% relative humidity and a  
103 12:12 light:dark cycle, and mosquitoes were maintained on 10% sucrose for the duration of the  
104 experiment. Mosquito mortality was monitored and recorded daily.

105       Every three days (up to day 21) we force-salivated 20 ZIKV-exposed mosquitoes per  
106 treatment group by immobilizing mosquitoes on ice, removing their legs and wings, and placing  
107 the proboscis of each mosquito into a pipet tip (containing 35  $\mu$ L FBS with 3 mmol/L ATP) for  
108 30 min on a 35°C warming plate. After salivation, we collected mosquito saliva, heads and legs,  
109 and bodies into 700  $\mu$ L of DMEM with 1x antibiotic/antimycotic. Each tissue was homogenized  
110 in a QIAGEN TissueLyzer at 30 cycles/second for 30 seconds, and centrifuged at 17,000xg for 5  
111 minutes at 4°C. To measure the proportion of mosquitoes that became infected, disseminated  
112 infection, and became infectious at each temperature, we tested for the presence/absence of

113 ZIKV in mosquito bodies, legs and heads, and saliva, respectively, using plaque assays on Vero  
114 cells as described above. Two full biological replicates were performed (Fig S1).

115

## 116 **Statistical analysis**

117       The effects of temperature was assessed on four different metrics of ZIKV infection. We  
118 used the numbers of mosquitoes becoming infected (ZIKV positive bodies), disseminated (ZIKV  
119 positive legs / heads), and infectious (ZIKV positive saliva) out of total numbers of mosquitoes  
120 exposed to assess the effect of temperature on the likelihood of ZIKV infection, dissemination,  
121 and infectiousness at the population level. We also used the numbers of mosquitoes that became  
122 infectious out of those successfully infected (positive bodies) as a measure of ZIKV  
123 dissemination efficiency. For each response variable, we used generalized linear mixed models  
124 (IBM<sup>®</sup> SPSS<sup>®</sup> Statistics 1.0.0.407), normal distribution and identity link function, to estimate the  
125 effects of temperature (16°C, 20°C, 24°C, 28°C, 32°C, 34°C, 36°C, 38°C), days post infection  
126 (dpi 3, 6, 9, 12, 15, 18, 21), and the interaction between temperature and dpi (fixed factors).  
127 Mosquito batch nested within experimental replicate was included in all models as a random  
128 factor. We determined the best model fit and distributions based on Akaike Information Criterion  
129 (AIC), the dispersion parameter, and by plotting model residuals. Sequential Bonferroni tests  
130 were used to assess the significance of pairwise comparisons within a significant main effect or  
131 interaction, and *p*-values greater than 0.05 were considered non-significant. Finally, to estimate  
132 the effects of temperature, ZIKV exposure and the interaction between temperature and ZIKV  
133 exposure on the daily probability of mosquito survival, we used the same framework in a Cox  
134 proportional hazards model (SAS<sup>®</sup> Studio, 3.6 Basic Edition) with temperature, infection status

135 (ZIKV-exposed or control) and the interaction as fixed factors, with mosquito batch nested  
136 within experimental replicate as a random factor.

137

### 138 **Mechanistic $R_0$ model**

139 In previous work, we assembled trait thermal response estimates from laboratory  
140 experiments that manipulated temperature and measured each of the following traits for *Ae.*  
141 *aegypti* and DENV: egg-to-adult development rate (*MDR*), survival probability ( $p_{EA}$ ), fecundity  
142 (*EFD*; eggs per female per day), biting rate ( $a$ ), adult mosquito mortality rate ( $\mu$ ), extrinsic  
143 incubation rate (*EIR*), and vector competence ( $bc$ ; equal to the proportion of exposed mosquitoes  
144 that become infected times the proportion of infected mosquitoes that become infectious, with  
145 virus in their saliva). We then synthesized them into an estimate for the thermal response of  $R_0$ ,  
146 the expected number of new cases generated by a single infectious person or mosquito  
147 introduced into a fully susceptible population throughout the period within which the person or  
148 mosquito is infectious [8]:

149

$$R_0(T) = \sqrt{\frac{\alpha(T)^2 bc(T) \exp(-\mu(T)/EIR(T)) EFD(T) p_{EA}(T) MDR(T)}{r \mu(T)^3}}$$

150

151 where  $r$  is the human recovery rate,  $T$  is environmental temperature, and  $T$  attached to a  
152 parameter indicates that the parameter is dependent on temperature. Here, we update three of  
153 these thermal response functions—average adult mosquito lifespan ( $lf=1/\mu$ ), extrinsic incubation  
154 rate (*EIR*), and vector competence ( $bc$ )—using the new experimental data from *Ae. aegypti*



155 mosquitoes exposed to ZIKV-infected blood meals across a range of constant temperatures (see  
156 Text S1).

157

## 158 **Mapping Seasonal Transmission Range**

159 To illustrate predicted temperature suitability for Zika transmission in the Americas, we  
160 mapped the number of months for which  $R_0(T) > 0$  for the posterior median response, based on the  
161 temperature-dependent model derived here and previously [8]. We calculated  $R_0(T)$  at 0.1°C  
162 increments and projected it onto the landscape for monthly mean current temperatures from  
163 WorldClim data at a 5-minute resolution (approximately 10km<sup>2</sup> at the equator). Climate data  
164 layers were extracted for the geographic area and defined using the Global Administrative  
165 Boundaries Databases [26]. All map calculations and manipulations were run in R using  
166 packages ‘raster’ [27], ‘maptools’ [28], and ‘Rgdal’ [29]. Resulting GeoTiffs were rendered in  
167 ArcGIS 10.3.1 [30], and mapped as figures. We then used the area represented by 6 months and  
168 12 months of transmission suitability to calculate and display the difference between a previous  
169 model parameterized on the *Ae. aegypti*-DENV system [8] and our current predictions.

170

## 171 **Results**

172 We found significant effects of temperature, days post-infection (dpi), and the interaction  
173 on the number of mosquitoes that became infected (ZIKV-positive bodies), that disseminated  
174 infection (ZIKV-positive legs and heads), and that became infectious (ZIKV-positive saliva). We  
175 also found significant effects of temperature, dpi, and the interaction on the overall transmission  
176 efficiency of ZIKV. Finally, these effects translated into significant effects of temperature on  $R_0$ ,

177 or predicted risk of transmission for ZIKV, which differed from previous estimates generated  
178 from DENV specific models.

179

## 180 **The effect of temperature on ZIKV infection and infection dynamics**

181 We observed strong, unimodal effects of temperature on the number of mosquitoes  
182 infected, with disseminated infections, and that became infectious (Table 1, Fig 1). While all  
183 three response variables dropped at both cool and warm temperatures, this decrease was more  
184 pronounced as the infection progressed (Fig 1). For example, the likelihood of becoming infected  
185 was the most permissive to temperature variation, with the number of infected mosquitoes  
186 minimized at 16°C (6%), maximized from 24°C-34°C (75% - 89%), and again minimized at  
187 38°C (7%). The likelihood of viral dissemination was more constrained, with numbers of  
188 mosquitoes with disseminated infections minimized at 16-20°C (4% - 3%), maximized at 28-  
189 34°C (65% - 77%), and again minimized at 38°C (5%). Finally, the likelihood of mosquitoes  
190 becoming infectious was the most sensitive to temperature, with the numbers of infectious  
191 mosquitoes minimized from 16-24°C (0%-4%), maximized between 28-34°C (23%-19%), and  
192 again minimized from 36-38°C (5%-0.4%). We also observed a significant effect of temperature  
193 on the rate that virus disseminated through the mosquito and could be detected in saliva  
194 (*temperature x day*, Table 1, Fig 2). In general (with the exception of 36°C and 38°C), we  
195 observed increases in the numbers of mosquitoes with ZIKV positive bodies, legs and heads, and  
196 saliva with time (Fig 2) suggesting that the time at which ZIKV was detected in these samples  
197 decreased with increasing temperature. At 36°C and 38°C, we see declines in these response  
198 variables over time due to high mosquito mortality.

199

## 200 **The effects of temperature on ZIKV dissemination efficiency**

201 We observed significant effects of temperature, dpi, and the interaction on the overall  
202 dissemination efficiency of ZIKV. ZIKV dissemination efficiency was maximized from 28 –  
203 34°C suggesting that ZIKV escape from the midgut and salivary gland invasion was most  
204 efficient at these temperatures (Fig 3). In contrast, dissemination efficiency was minimized at  
205 both cooler (16 - 20°C) and warmer temperatures (38°C). Interestingly, cooler temperatures had  
206 a more dramatic effect on dissemination efficiency relative to warmer temperatures. For  
207 example, although 60% of exposed mosquitoes became successfully infected at 20°C, we had  
208 very low salivary gland invasion, with only one mosquito across both trials becoming infectious.  
209 In contrast, at warm temperatures infection and dissemination efficiencies were very robust (Fig  
210 S2), but the mortality associated with the warm temperatures resulted in low numbers of  
211 mosquitoes that were capable of being infectious. Finally, of those successfully infected, we  
212 observed successful salivary gland invasion to occur earlier in the infection process as  
213 temperatures warmed (Fig 3).

214

## 215 **The effect of temperature on mosquito survival**

216 We observed significant effects of temperature and an interaction between temperature  
217 and ZIKV exposure on the daily probability of mosquito survival (Fig S3, Table 3). Overall, the  
218 daily probability of mosquito survival was highest for mosquitoes housed at 24°C and 28°C  
219 relative to cooler (16 - 20°C) and warmer (32 - 38°C) temperatures. Mosquito survival was  
220 lowest at the warmest temperature of 38°C, with no mosquitoes surviving past 3 dpi. ZIKV-  
221 exposed mosquitoes experienced a higher daily probability of survival at 24°C and 28°C relative  
222 to unexposed, control mosquitoes with greater than 90% survival at the optimal temperatures.

223

## 224 **The effect of temperature on ZIKV transmission risk**

225 Trait thermal responses for lifespan, vector competence, and extrinsic incubation rate  
226 were all unimodal (Fig 4, Table 1 SI, Fig S4). Mosquito lifespan and vector competence thermal  
227 responses were symmetrical, peaking at 24.2°C (95% CI: 21.9 – 25.9°C) and 30.6°C (95% CI:  
228 29.6 – 31.4°C), respectively, while the extrinsic incubation rate thermal response was  
229 asymmetrical with a peak at 36.4°C (95% CI: 33.6 – 39.1°C). Applying these new trait thermal  
230 responses to the  $R_0(T)$  model [8], we found that  $R_0(T)$  peaked at 28.9°C (95% CI: 28.1 – 29.5°C),  
231 with lower and upper limits of 22.7°C (95% CI: 21.0 – 23.9°C) and 34.7°C (95% CI: 34.1 –  
232 35.8°C), respectively (Fig 5). The seasonal transmission of ZIKV was predicted to be more  
233 constricted in latitudinal range from this temperature –transmission relationship than what has  
234 been predicted previously [8], primarily because the predicted thermal minimum for ZIKV was  
235 5°C warmer than for DENV (S5 Fig). The estimated change in land area this represents in the  
236 Americas for endemic (12 month, year-round suitability), and overall predicted range (1-12  
237 months suitability) is 4.3 million km<sup>2</sup> and 6.03 million km<sup>2</sup>, respectively (Fig 6).

238 While there is some evidence that mosquito longevity varies for virus-exposed versus  
239 control mosquitoes, where unexposed mosquitoes had shorter lifespans at near-optimal  
240 temperatures (24°C and 28°C; Fig 4 and S3), we did not include this difference in the  $R_0$  model  
241 for two reasons. First, with limited data to parameterize the low temperature range for survival,  
242 we are unable to characterize the differences in the lower end of the thermal response functions  
243 in detail. Second, the standard  $R_0$  model does not incorporate differences in survival for infected  
244 versus uninfected mosquitoes because it assumes that the pathogen is rare and that all mosquitoes

245 are uninfected. For this reason, we fit a single thermal response function for lifespan to the full  
246 dataset and used it in the  $R_0$  model.

247

## 248 **Discussion**

249 The dynamics and distribution of vector-borne diseases depend on the interplay between  
250 the pathogen, the mosquito, and the environment [31]. Temperature is a strong driver of vector-  
251 borne disease transmission, and characterizing the thermal range and optimum for transmission  
252 is essential for accurately predicting how arbovirus emergence and transmission will be affected  
253 by seasonality, geography, climate and land use change. Yet current models of recently emerging  
254 arboviruses (e.g. CHIKV [25, 32] and ZIKV [e.g. 6, 7, 9]) are constrained by a lack of data on  
255 the thermal sensitivity of key pathogen traits. In this study, we experimentally estimated the  
256 relationship between temperature and measures of ZIKV vector competence, extrinsic incubation  
257 rate, and mosquito mortality. By incorporating these temperature-trait relationships into an  
258 existing mechanistic model, we demonstrate that like malaria [20, 33] and dengue virus [8],  
259 ZIKV transmission also has a strong unimodal relationship with temperature.

260 The effect of temperature on ZIKV transmission is shaped by the complex interaction of  
261 individual trait responses of the mosquito and the pathogen with temperature. As studies have  
262 demonstrated in other arbovirus systems, temperature significantly affects vector competence [8,  
263 21, 22, 34-39]. We show that temperature has a unimodal relationship with vector competence,  
264 with an estimated optimum at 30.6°C and an estimated thermal minimum and maximum of  
265 22.9°C and 38.4°C, respectively (based on posterior median estimates for  $T_0$  and  $T_m$ ). ZIKV  
266 infection was limited by different mechanisms at the thermal minimum and maximum. Cool  
267 temperatures limited midgut escape and dissemination resulting in a lower proportion of the

268 mosquito population that was infectious. This could be due to temperature effects on mosquito  
269 physiology [40], immunity [17, 41-44], and viral binding to specific receptors in the midgut,  
270 secondary tissues, and salivary glands [45]. Warmer temperatures, on the other hand, were very  
271 permissive for ZIKV infection, resulting in 95% and 100% infection among surviving  
272 mosquitoes at 36°C and 38°C, respectively (Fig S2). However, high mosquito mortality resulted  
273 in an overall low proportion of the mosquito population becoming infected and infectious (Fig  
274 S3). A similar nonlinear effect of cool and warm temperatures on vector competence was  
275 observed with *Ae. albopictus* infected with DENV2 [39]. In contrast, Adelman et al. [18]  
276 demonstrated that cooler temperatures resulted in increased susceptibility to chikungunya and  
277 yellow fever virus due to impairment of the RNAi pathway. However, we only exposed adult  
278 mosquitoes to varying mean temperatures, while Adelman et al. [18] looked at the carry-over  
279 effects of larval rearing temperature. Both larval and adult temperature variation will likely be  
280 important in the field in determining temperature effects on mosquito and pathogen traits  
281 comprising arbovirus transmission.

282 We also observed an asymmetrical unimodal relationship between temperature and the  
283 extrinsic incubation rate of ZIKV, with the extrinsic incubation rate optimized at 36.4°C and  
284 minimized at 19.7°C and 42.5°C (based on posterior median estimates for  $T_0$  and  $T_m$ ). The effects  
285 of temperature on the extrinsic incubation periods of arboviruses and other mosquito pathogens  
286 have been extensively studied (dengue virus [39, 46, 47], yellow fever virus [22], West Nile  
287 virus [21], chikungunya virus [48], and malaria [49, 50]). Consistent with previous studies, we  
288 show that the extrinsic incubation rate of ZIKV increased with warming temperatures, with no  
289 infectious mosquitoes observed at 16°C after 21 days post infection and the first infectious  
290 mosquito detected at day 3 post infection at 38°C. The extrinsic incubation rate was ultimately

291 constrained at the warmer temperatures due to high mosquito mortality. This is not surprising as  
292 metabolic reaction rates tend to increase exponentially to an optimal temperature, then decline  
293 rapidly due to protein degradation and other processes [51, 52].

294 The optimal temperature for mosquito fitness and viral dissemination need not be  
295 equivalent, and the impacts of temperature on mosquito mortality relative to the extrinsic  
296 incubation rate of arboviruses can have important implications for the total proportion of the  
297 mosquito population that is alive and infectious [49, 53]. In our study, mosquito lifespan was  
298 optimized at 24.2°C and minimized at 11.7°C and 37.2°C, respectively (based on posterior  
299 median estimates for  $T_0$  and  $T_m$ ). The non-linear relationship between metrics of mosquito  
300 mortality or lifespan and temperature has also been demonstrated for *Ae. aegypti* [8], *Ae.*  
301 *albopictus* [8, 19] and various *Anopheles* spp. [20, 50]. Despite the fact that the extrinsic  
302 incubation period was optimized at a warm temperature (36.4°C), the optimal temperature for  
303 overall ZIKV transmission ( $R_0$ ) was predicted to be cooler (28.9°C) because mosquitoes have a  
304 significantly shortened lifespan above 32°C. In contrast, even though mosquitoes are predicted to  
305 have relatively longer lifespans at cooler temperatures, the time required for mosquitoes to  
306 become infectious (>21 days at 16°C and 18 days at 20°C) may be longer than most mosquitoes  
307 experience in the field. As a result, large vector populations may not be sufficient for  
308 transmitting the virus if viral replication is inhibited or if the lifespan of the mosquito is shorter  
309 than the extrinsic incubation period [54]. One surprising result was that mosquitoes exposed to  
310 ZIKV were predicted to live significantly longer at temperatures that optimized mosquito  
311 survival as compared to unexposed mosquitoes (37 vs. 87 days at 24°C; 45 vs. 54 days at 28°C).  
312 Additionally, the temperature that optimizes mosquito lifespan might also vary between ZIKV  
313 exposed mosquitoes (24°C) and their uninfected counterparts (28°C). If similar trends hold for

314 other arbovirus systems, current modeling efforts may be underestimating virus transmission  
315 potential under certain environmental scenarios. If a survival benefit of virus exposure regularly  
316 occurs at optimal temperatures across arbovirus systems, estimating mosquito mortality in the  
317 field for mosquitoes of different infection statuses and the physiological underpinnings of this  
318 response are important areas for future research.

319         After incorporating the relationships between temperature and vector competence, the  
320 extrinsic incubation rate, and mosquito lifespan into a mechanistic model, we demonstrated that  
321 ZIKV transmission is optimized at a mean temperature of approximately 29°C, and has a thermal  
322 range of 22.7°C to 34.7°C. Because this relationship is nonlinear and unimodal, we can expect as  
323 temperatures move toward the thermal optimum due to future climate change or increasing  
324 urbanization [55], environmental suitability for ZIKV transmission should increase, potentially  
325 resulting in expansion of ZIKV further north and into longer seasons. There is evidence that this  
326 is already occurring with warming at high elevations in the Ethiopian and Columbian highlands  
327 leading to increased incidence of malaria [15]. In contrast, in areas that are already permissive  
328 and near the thermal optimum for ZIKV transmission, future warming and urbanization may lead  
329 to decreases in overall environmental suitability [23]. Accurately estimating the optimal  
330 temperature for transmission is thus paramount for predicting where climate warming will  
331 expand, contract, or shift transmission potential.

332         By using a mechanistic model originally parameterized for DENV, we also explored a  
333 common assumption made by multiple models that DENV transmission has a similar  
334 relationship with temperature as ZIKV [6-9]. While the temperature optimum and maximum for  
335  $R_0$  changed very little from our previous DENV  $R_0$  model, the temperature minimum for  
336 transmission increased by nearly five degrees in the updated model (Fig S5). This is mainly due



337 to a higher thermal minimum for both vector competence and the extrinsic incubation rate for  
338 ZIKV as compared to DENV (Fig S5 [8]). Differences in the thermal niche of ZIKV relative to  
339 DENV or our field derived *Ae. aegypti* relative to those populations assessed in Mordecai et al.  
340 [8] could explain this difference. There is evidence in a range of invertebrate-pathogen systems  
341 (spanning fruit flies, *Daphnia* pea aphids, and mosquitoes) that the effects of environmental  
342 variation on disease transmission are often modified by the genetic background of the host and  
343 infecting pathogen [38, 56-61]. Thus, more work is required to validate the generalizability of  
344 these models.

345 Our mapped seasonal ranges underscore the impact of a more refined empirical  
346 derivation of a pathogen-specific temperature dependent  $R_0$ , contrasted with the *Aedes aegypti*  
347 dengue prediction of previous studies [6-8]. The higher predicted thermal minimum for ZIKV  
348 resulted in a contraction in the areas of the Americas where year-round, endemic transmission  
349 suitability (12 months only) are predicted to occur. This area corresponds to a change of  
350 approximately 4.3 million km<sup>2</sup> in land area (Fig 6). Additionally, this higher thermal minimum  
351 contributes to a reduction in the overall estimated suitability for ZIKV transmission (all 1-12  
352 months of transmission) resulting in an estimated difference of 6.03 million km<sup>2</sup>. In particular, in  
353 the Florida peninsula where the primary focus of ZIKV cases within the U.S. occurred, our  
354 updated model (the median model – 50<sup>th</sup> percentile posterior) now predicts only around six  
355 months of temperature suitability during the year (Fig 6) vs. almost year-round as predicted by a  
356 previous temperature-dependent  $R_0$  model parameterized on the *Ae. aegypti*-DENV system [8].  
357 This contrast in seasonal suitability where ZIKV established in the USA is striking, and  
358 emphasizes the value of increasing empirical data and reexamining these types of model, as the  
359 capacity to do so becomes possible, in the face of an emerging epidemic.

360 Finally, although we estimated the effects of mean constant temperatures on ZIKV  
361 transmission. Yet mosquitoes and their pathogens live in a variable world where temperatures  
362 fluctuate daily and seasonally, and temperature-trait relationships have been shown to differ in  
363 fluctuating environments relative to constant temperature environments [23, 62-64]. While  
364 characterizing trait responses to mean constant temperatures and incorporating these  
365 relationships into models of disease transmission is tractable, more effort is needed in validating  
366 computational approaches to infer transmission in a fluctuating environment (i.e. rate summation  
367 [8, 65]).

368 Accurately predicting arbovirus transmission will be influenced by variation in other  
369 sources of abiotic (e.g. relative humidity, rainfall), biotic (e.g. availability and quality of  
370 oviposition and resting habitats), and socioeconomic factors that influence human exposure to  
371 biting mosquitoes. However, this is a fundamental first step for empirically defining and  
372 validating current models on the environmental suitability for ZIKV transmission, in which  
373 temperature will be a strong driver. Understanding the unimodal effect of temperature on  
374 emerging arboviruses, like ZIKV, will contribute to accurate predictions about how future land  
375 use and climate change could modify arbovirus emergence and transmission through shifts in  
376 mosquito microclimate.  $R_0$  models have been used as a tool to guide vector-borne disease  
377 interventions, and is a comprehensive metric of pathogen fitness. We anticipate, as with other  
378 vector-borne diseases [8, 20, 33], that environmental suitability for ZIKV transmission could  
379 expand northwards with future warming, but will be more constrained at low temperatures than  
380 DENV. We also predict areas that are already at or near the thermal optimum of 29°C to  
381 experience a decrease in environmental suitability for ZIKV transmission [20, 23]. Further, land  
382 use change that modifies the microclimates mosquitoes experience could have immediate

383 impacts on ZIKV transmission [55], which might explain the explosive spread of ZIKV in urban  
384 centers throughout the Americas.

385

## 386 **Acknowledgments**

387 We thank the University of Texas Medical Branch Arbovirus Reference Collection for  
388 providing the virus. We thank Dr. Américo Rodríguez from the Instituto Nacional de Salud  
389 Pública for providing mosquito eggs. We gratefully acknowledge the members of the Murdock  
390 and Brindley labs for thoughtful comments on the project and manuscript. This study was  
391 supported by the National Science Foundation, Grants for Rapid Response Research (NSF-  
392 RAPID) 1640780. Erin A. Mordecai and Sadie J. Ryan were supported by NSF DEB-1518681.  
393 Erin A. Mordecai was additionally supported by the Stanford University Woods Institute for the  
394 Environment Environmental Ventures Program. Sadie J. Ryan was additionally supported by the  
395 CDC grant 1U01CK000510-01: Southeastern Regional Center of Excellence in Vector-Borne  
396 Diseases: the Gateway Program, to SJR. This publication was supported by the Cooperative  
397 Agreement Number above from the Centers for Disease Control and Prevention. Its contents are  
398 solely the responsibility of the authors and do not necessarily represent the official views of the  
399 Centers for Disease Control and Prevention. Any opinions, findings, and conclusions or  
400 recommendations expressed in this material are those of the authors and do not necessarily  
401 reflect the views of the National Science Foundation.

## 402 **References**

- 403 1. Brady O.J., Gething P.W., Bhatt S., Messina J.P., Brownstein J.S., Hoen A.G., Moyes C.L.,  
404 Farlow A.W., Scott T.W., Hay S.I. 2012 Refining the global spatial limits of dengue virus  
405 transmission by evidence-based consensus. *PLoS Negl Trop Dis* **6**(8), e1760.  
406 (doi:10.1371/journal.pntd.0001760).
- 407 2. PAHO. 2018 Pan American Health Organisation. (
- 408 3. Cao-Lormeau V.-M., Blake A., Mons S., Lastère S., Roche C., Vanhomwegen J., Dub T.,  
409 Baudouin L., Teissier A., Larre P., et al. 2016 Guillain-Barre Syndrome outbreak associated with  
410 Zika virus infection in French Polynesia: a case-control study. *The Lancet* **387**(10027), 1531-  
411 1539. (doi:10.1016/S0140-6736(16)00562-6).
- 412 4. Mlakar J., Korva M., Tul N., Popovic M., Poljsak-Prijatelj M., Mraz J., Kolenc M., Resman  
413 Rus K., Vesnaver Vipotnik T., Fabjan Vodusek V., et al. 2016 Zika virus associated with  
414 microcephaly. *N Engl J Med* **374**(10), 951-958. (doi:10.1056/NEJMoa1600651).
- 415 5. World Health Organization. 2016 WHO statement on the first meeting of the International  
416 Health Regulations (2005) (IHR 2005) Emergency Committee on Zika virus and observed  
417 increase in neurological disorders and neonatal malformations. (
- 418 6. Messina J.P., Kraemer M.U., Brady O.J., Pigott D.M., Shearer F.M., Weiss D.J., Golding N.,  
419 Ruktanonchai C.W., Gething P.W., Cohn E., et al. 2016 Mapping global environmental  
420 suitability for Zika virus. *Elife* **5**. (doi:10.7554/eLife.15272).
- 421 7. Samy A.M., Thomas S.M., Wahed A.A., Cohoon K.P., Peterson A.T. 2016 Mapping the  
422 global geographic potential of Zika virus spread. *Mem Inst Oswaldo Cruz* **111**(9), 559-560.  
423 (doi:10.1590/0074-02760160149).

- 424 8. Mordecai E., Cohen J., Evans M.V., Gudapati P., Johnson L.R., Lippi C.A., Miazgowicz K.,  
425 Murdock C.C., Rohr J.R., Ryan S.J., et al. 2017 Detecting the impact of temperature on  
426 transmission of Zika, dengue, and chikungunya using mechanistic models. *PLoS Negl Trop Dis*  
427 **11**(4), e0005568. (doi:<https://doi.org/10.1371/journal.pntd.0005568>).
- 428 9. Caminade C., Turner J., Metelmann S., Hesson J.C., Blagrove M.S., Solomon T., Morse A.P.,  
429 Baylis M. 2017 Global risk model for vector-borne transmission of Zika virus reveals the role of  
430 El Nino 2015. *Proc Natl Acad Sci U S A* **114**(1), 119-124. (doi:10.1073/pnas.1614303114).
- 431 10. Liu-Helmersson J., Stenlund H., Wilder-Smith A., Rocklöv J. 2014 Vectorial capacity of  
432 *Aedes aegypti*: effects of temperature and implications for global dengue epidemic potential.  
433 *PLoS One* **9**(3), e89783. (doi:10.1371/journal.pone.0089783).
- 434 11. Morin C.W., Monaghan A.J., Hayden M.H., Barrera R., Ernst K. 2015 Meteorologically  
435 Driven Simulations of Dengue Epidemics in San Juan, PR. *PLoS Negl Trop Dis* **9**(8), e0004002.  
436 (doi:10.1371/journal.pntd.0004002).
- 437 12. Gething P.W., Van Boeckel T.P., Smith D.L., Guerra C.A., Patil A.P., Snow R.W., Hay S.I.  
438 2011 Modelling the global constraints of temperature on transmission of *Plasmodium falciparum*  
439 and *P. vivax*. *Parasit Vectors* **4**, 92. (doi:10.1186/1756-3305-4-92).
- 440 13. Hay S.I., Cox J., Rogers D.J., Randolph S.E., Stern D.I., Shanks G.D., Myers M.F., Snow  
441 R.W. 2002 Climate change and the resurgence of malaria in the East African highlands. *Nature*  
442 **415**(6874), 905-909. (doi:10.1038/415905a).
- 443 14. Ryan S.J., McNally A., Johnson L.R., Mordecai E.A., Ben-Horin T., Paaijmans K., Lafferty  
444 K.D. 2015 Mapping Physiological Suitability Limits for Malaria in Africa Under Climate  
445 Change. *Vector Borne Zoonotic Dis* **15**(12), 718-725. (doi:10.1089/vbz.2015.1822).

- 446 15. Siraj A.S., Santos-Vega M., Bouma M.J., Yadeta D., Carrascal D.R., Pascual M. 2014  
447 Altitudinal changes in malaria incidence in highlands of Ethiopia and Colombia. *Science*  
448 **343**(6175), 1154-1158. (doi:10.1126/science.1244325).
- 449 16. Murdock C.C., Moller-Jacobs L.L., Thomas M.B. 2013 Complex environmental drivers of  
450 immunity and resistance in malaria mosquitoes. *Proc Biol Sci* **280**(1770), 20132030.  
451 (doi:10.1098/rspb.2013.2030).
- 452 17. Murdock C.C., Paaijmans K.P., Bell A.S., King J.G., Hillyer J.F., Read A.F., Thomas M.B.  
453 2012 Complex effects of temperature on mosquito immune function. *Proc Biol Sci* **279**(1741),  
454 3357-3366. (doi:10.1098/rspb.2012.0638).
- 455 18. Adelman Z.N., Anderson M.A., Wiley M.R., Murreddu M.G., Samuel G.H., Morazzani  
456 E.M., Myles K.M. 2013 Cooler temperatures destabilize RNA interference and increase  
457 susceptibility of disease vector mosquitoes to viral infection. *PLoS Negl Trop Dis* **7**(5), e2239.  
458 (doi:10.1371/journal.pntd.0002239).
- 459 19. Delatte H., Gimonneau G., Triboire A., Fontenille D. 2009 Influence of temperature on  
460 immature development, survival, longevity, fecundity, and gonotrophic cycles of *Aedes*  
461 *albopictus*, vector of chikungunya and dengue in the Indian Ocean. *J Med Entomol* **46**(1), 33-41.
- 462 20. Mordecai E.A., Paaijmans K.P., Johnson L.R., Balzer C., Ben-Horin T., de Moor E.,  
463 McNally A., Pawar S., Ryan S.J., Smith T.C., et al. 2013 Optimal temperature for malaria  
464 transmission is dramatically lower than previously predicted. *Ecol Lett* **16**(1), 22-30.  
465 (doi:10.1111/ele.12015).
- 466 21. Kilpatrick A.M., Meola M.A., Moudy R.M., Kramer L.D. 2008 Temperature, viral genetics,  
467 and the transmission of West Nile virus by *Culex pipiens* mosquitoes. *PLoS Pathog* **4**(6),  
468 e1000092. (doi:10.1371/journal.ppat.1000092).

- 469 22. Johansson M.A., Arana-Vizcarrondo N., Biggerstaff B.J., Staples J.E. 2010 Incubation  
470 periods of Yellow fever virus. *Am J Trop Med Hyg* **83**(1), 183-188. (doi:10.4269/ajtmh.2010.09-  
471 0782).
- 472 23. Murdock C.C., Sternberg E.D., Thomas M.B. 2016 Malaria transmission potential could be  
473 reduced with current and future climate change. *Sci Rep* **6**, 27771. (doi:10.1038/srep27771).
- 474 24. Ruiz-Moreno D., Vargas I.S., Olson K.E., Harrington L.C. 2012 Modeling dynamic  
475 introduction of Chikungunya virus in the United States. *PLoS Negl Trop Dis* **6**(11), e1918.  
476 (doi:10.1371/journal.pntd.0001918).
- 477 25. Johansson M.A., Powers A.M., Pesik N., Cohen N.J., Staples J.E. 2014 Nowcasting the  
478 spread of chikungunya virus in the Americas. *PLoS One* **9**(8), e104915.  
479 (doi:10.1371/journal.pone.0104915).
- 480 26. GADM. 2012 GADM database of Global Administrative Boundaries. (
- 481 27. Hijmans R.J. 2016 *raster: Geographic Data Analysis and Modeling*.
- 482 28. Bivand R., Lewin-Koh N. 2017 *maptools: Tools for Reading and Handling Spatial Objects*.
- 483 29. Bivand R., Keitt T., Rowlingson B. 2017 *rgdal: Bindings for the "Geospatial" Data*  
484 *Abstraction Library*.
- 485 30. ESRI. 2015 ArcGIS Desktop. (ed. Institute E.S.R.). Redlands, CA.
- 486 31. Parham P.E., Waldock J., Christophides G.K., Hemming D., Augusto F., Evans K.J.,  
487 Fefferman N., Gaff H., Gumel A., LaDeau S., et al. 2015 Climate, environmental and socio-  
488 economic change: weighing up the balance in vector-borne disease transmission. *Philosophical*  
489 *Transactions of the Royal Society B: Biological Sciences* **370**(1665), 20130551.  
490 (doi:10.1098/rstb.2013.0551).

- 491 32. Nsoesie E.O., Kraemer M.U., Golding N., Pigott D.M., Brady O.J., Moyes C.L., Johansson  
492 M.A., Gething P.W., Velayudhan R., Khan K., et al. 2016 Global distribution and environmental  
493 suitability for chikungunya virus, 1952 to 2015. *Euro surveillance : bulletin Europeen sur les*  
494 *maladies transmissibles = European communicable disease bulletin* **21**(20), 10.2807/1560-  
495 7917.ES.2016.2821.2820.30234. (doi:10.2807/1560-7917.ES.2016.21.20.30234).
- 496 33. Johnson L.R., Ben-Horin T., Lafferty K.D., McNally A., Mordecai E., Paaijmans K.P.,  
497 Pawar S., Ryan S.J. 2015 Understanding uncertainty in temperature effects on vector-borne  
498 disease: a Bayesian approach. *Ecology* **96**(1), 203-213.
- 499 34. Alto B.W., Bettinardi D. 2013 Temperature and dengue virus infection in mosquitoes:  
500 independent effects on the immature and adult stages. *Am J Trop Med Hyg* **88**(3), 497-505.  
501 (doi:10.4269/ajtmh.12-0421).
- 502 35. Thu H.M., Aye K.M., Thein S. 1998 The effect of temperature and humidity on dengue virus  
503 propagation in *Aedes aegypti* mosquitos. *Southeast Asian J Trop Med Public Health* **29**(2), 280-  
504 284.
- 505 36. Watts D.M., Burke D.S., Harrison B.A., Whitmire R.E., Nisalak A. 1987 Effect of  
506 temperature on the vector efficiency of *Aedes aegypti* for dengue 2 virus. *Am J Trop Med Hyg*  
507 **36**(1), 143-152.
- 508 37. McLean D.M., Clarke A.M., Coleman J.C., Montalbe.Ca, Skidmore A.G., Walters T.E.,  
509 Wise R. 1974 Vector capability of *Aedes aegypti* mosquitoes for California encephalitis and  
510 dengue viruses at various temperatures. *Can J Microbiol* **20**(2), 255-&.
- 511 38. Zouache K., Fontaine A., Vega-Rua A., Mousson L., Thiberge J.M., Lourenco-De-Oliveira  
512 R., Caro V., Lambrechts L., Failloux A.B. 2014 Three-way interactions between mosquito



- 513 population, viral strain and temperature underlying chikungunya virus transmission potential.  
514 *Proc Biol Sci* **281**(1792). (doi:10.1098/rspb.2014.1078).
- 515 39. Xiao F.Z., Zhang Y., Deng Y.Q., He S., Xie H.G., Zhou X.N., Yan Y.S. 2014 The effect of  
516 temperature on the extrinsic incubation period and infection rate of dengue virus serotype 2  
517 infection in *Aedes albopictus*. *Arch Virol* **159**(11), 3053-3057. (doi:10.1007/s00705-014-2051-  
518 1).
- 519 40. Houk E.J., Obie F., Hardy J.L. 1979 Peritrophic membrane formation and the midgut barrier  
520 to arboviral infection in the mosquito, *Culex tarsalis* Coquillett (Insecta, Diptera). *Acta Trop*  
521 **36**(1), 39-45.
- 522 41. Murdock C.C., Paaijmans K.P., Cox-Foster D., Read A.F., Thomas M.B. 2012 Rethinking  
523 vector immunology: the role of environmental temperature in shaping resistance. *Nat Rev*  
524 *Microbiol* **10**(12), 869-876. (doi:10.1038/nrmicro2900).
- 525 42. McFarlane M., Arias-Goeta C., Martin E., O'Hara Z., Lulla A., Mousson L., Rainey S.M.,  
526 Misbah S., Schnettler E., Donald C.L., et al. 2014 Characterization of *Aedes aegypti* innate-  
527 immune pathways that limit Chikungunya virus replication. *PLoS Negl Trop Dis* **8**(7), e2994.  
528 (doi:10.1371/journal.pntd.0002994).
- 529 43. Etebari K., Hegde S., Saldaña M.A., Widen S.G., Wood T.G., Asgari S., Hughes G.L. 2017  
530 Global transcriptome analysis of *Aedes aegypti* mosquitoes in response to Zika virus infection.  
531 *mSphere* **2**(6). (doi:10.1128/mSphere.00456-17).
- 532 44. Saldaña M.A., Etebari K., Hart C.E., Widen S.G., Wood T.G., Thangamani S., Asgari S.,  
533 Hughes G.L. 2017 Zika virus alters the microRNA expression profile and elicits an RNAi  
534 response in *Aedes aegypti* mosquitoes. *PLoS Negl Trop Dis* **11**(7), e0005760.  
535 (doi:10.1371/journal.pntd.0005760).

- 536 45. Franz A.W., Kantor A.M., Passarelli A.L., Clem R.J. 2015 Tissue Barriers to Arbovirus  
537 Infection in Mosquitoes. *Viruses* **7**(7), 3741-3767. (doi:10.3390/v7072795).
- 538 46. Rohani A., Wong Y.C., Zamre I., Lee H.L., Zurainee M.N. 2009 The effect of extrinsic  
539 incubation temperature on development of dengue serotype 2 and 4 viruses in *Aedes aegypti* (L.).  
540 *Southeast Asian J Trop Med Public Health* **40**(5), 942-950.
- 541 47. Chan M., Johansson M.A. 2012 The incubation periods of Dengue viruses. *PLoS One* **7**(11),  
542 e50972. (doi:10.1371/journal.pone.0050972).
- 543 48. Christofferson R.C., Chisenhall D.M., Wearing H.J., Mores C.N. 2014 Chikungunya viral  
544 fitness measures within the vector and subsequent transmission potential. *PLoS One* **9**(10),  
545 e110538. (doi:10.1371/journal.pone.0110538).
- 546 49. Shapiro L.L.M., Whitehead S.A., Thomas M.B. 2017 Quantifying the effects of temperature  
547 on mosquito and parasite traits that determine the transmission potential of human malaria. *PLoS*  
548 *Biol* **15**(10), e2003489. (doi:10.1371/journal.pbio.2003489).
- 549 50. Paaijmans K.P., Blanford S., Chan B.H., Thomas M.B. 2012 Warmer temperatures reduce  
550 the vectorial capacity of malaria mosquitoes. *Biol Lett* **8**(3), 465-468.  
551 (doi:10.1098/rsbl.2011.1075).
- 552 51. Dell A.I., Pawar S., Savage V.M. 2013 The thermal dependence of biological traits. *Ecology*  
553 **94**(5), 1205-1206.
- 554 52. Johnson F.H., Eyring H., Stover B.J. 1974 *The Theory of Rate Processes in Biology and*  
555 *Medicine*. New York, Wiley.
- 556 53. Brady O.J., Godfray H.C., Tatem A.J., Gething P.W., Cohen J.M., McKenzie F.E., Alex  
557 Perkins T., Reiner R.C., Jr., Tusting L.S., Scott T.W., et al. 2015 Adult vector control, mosquito  
558 ecology and malaria transmission. *Int Health* **7**(2), 121-129. (doi:10.1093/inthealth/ihv010).

- 559 54. Morin C.W., Comrie A.C., Ernst K. 2013 Climate and Dengue Transmission: Evidence and  
560 Implications. *Environmental Health Perspectives* **121**(11-12), 1264-1272.  
561 (doi:10.1289/ehp.1306556).
- 562 55. Murdock C.C., Evans M.V., McClanahan T.D., Miazgowicz K.L., Tesla B. 2017 Fine-scale  
563 variation in microclimate across an urban landscape shapes variation in mosquito population  
564 dynamics and the potential of *Aedes albopictus* to transmit arboviral disease. *PLoS Negl Trop*  
565 *Dis* **11**(5), e0005640. (doi:10.1371/journal.pntd.0005640).
- 566 56. Stacey D.A., Thomas M.B., Blanford S., Pell J.K., Pugh C., Fellows M.D. 2003 Genotype  
567 and temperature influences pea aphid resistance to a fungal entomopathogen. *Physiol Entomol*  
568 **28**, 75-81.
- 569 57. Vale P.F., Stjernman M., Little T.J. 2008 Temperature-dependent costs of parasitism and  
570 maintenance of polymorphism under genotype-by-environment interactions. *J Evol Biol* **21**(5),  
571 1418-1427. (doi:10.1111/j.1420-9101.2008.01555.x).
- 572 58. Lazzaro B.P., Flores H.A., Lorigan J.G., Yourth C.P. 2008 Genotype-by-environment  
573 interactions and adaptation to local temperature affect immunity and fecundity in *Drosophila*  
574 *melanogaster*. *PLoS Pathog* **4**(3), e1000025. (doi:10.1371/journal.ppat.1000025).
- 575 59. Gloria-Soria A., Armstrong P.M., Powell J.R., Turner P.E. 2017 Infection rate of *Aedes*  
576 *aegypti* mosquitoes with dengue virus depends on the interaction between temperature and  
577 mosquito genotype. *Proc Biol Sci* **284**(1864). (doi:10.1098/rspb.2017.1506).
- 578 60. Lambrechts L., Quillery E., Noel V., Richardson J.H., Jarman R.G., Scott T.W., Chevillon C.  
579 2013 Specificity of resistance to dengue virus isolates is associated with genotypes of the  
580 mosquito antiviral gene Dicer-2. *Proc Biol Sci* **280**(1751), 20122437.  
581 (doi:10.1098/rspb.2012.2437).

- 582 61. Chouin-Carneiro T., Vega-Rua A., Vazeille M., Yebakima A., Girod R., Goindin D.,  
583 Dupont-Rouzeyrol M., Lourenco-de-Oliveira R., Failloux A.B. 2016 Differential susceptibilities  
584 of *Aedes aegypti* and *Aedes albopictus* from the Americas to Zika virus. *PLoS Negl Trop Dis*  
585 **10**(3), e0004543. (doi:10.1371/journal.pntd.0004543).
- 586 62. Paaijmans K.P., Blanford S., Bell A.S., Blanford J.I., Read A.F., Thomas M.B. 2010  
587 Influence of climate on malaria transmission depends on daily temperature variation. *Proc Natl*  
588 *Acad Sci U S A* **107**(34), 15135-15139. (doi:10.1073/pnas.1006422107).
- 589 63. Carrington L.B., Seifert S.N., Willits N.H., Lambrechts L., Scott T.W. 2013 Large diurnal  
590 temperature fluctuations negatively influence *Aedes aegypti* (Diptera: Culicidae) life-history  
591 traits. *J Med Entomol* **50**(1), 43-51.
- 592 64. Lambrechts L., Paaijmans K.P., Fansiri T., Carrington L.B., Kramer L.D., Thomas M.B.,  
593 Scott T.W. 2011 Impact of daily temperature fluctuations on dengue virus transmission by *Aedes*  
594 *aegypti*. *Proc Natl Acad Sci U S A* **108**(18), 7460-7465. (doi:10.1073/pnas.1101377108).
- 595 65. Worner S.P. 1992 Performance of Phenological Models Under Variable Temperature  
596 Regimes: Consequences of the Kaufmann or Rate Summation Effect. *Environmental*  
597 *Entomology* **21**(4), 689-699. (doi:10.1093/ee/21.4.689).
- 598
- 599

600 **Table 1.** Results from generalized linear mixed effects models examining the effects of  
 601 temperature, day, and the interaction on the numbers (out of total exposed) of mosquitoes  
 602 infected, with disseminated infections, infectiousness, and a measure of dissemination efficiency.

| response variables       | temperature |      |         | day    |      |         | temperature x day |      |         |
|--------------------------|-------------|------|---------|--------|------|---------|-------------------|------|---------|
|                          | F           | d.f. | p-value | F      | d.f. | p-value | F                 | d.f. | p-value |
| number infected          | 86.159      | 7    | <0.0001 | 1.349  | 6    | 0.251   | 8.374             | 42   | <0.0001 |
| number disseminated      | 139.085     | 7    | <0.0001 | 14.742 | 6    | <0.0001 | 12.477            | 42   | <0.0001 |
| number infectious        | 34.012      | 7    | <0.0001 | 8.876  | 6    | <0.0001 | 4.846             | 42   | <0.0001 |
| dissemination efficiency | 15.308      | 7    | <0.0001 | 7.699  | 6    | <0.0001 | 4.431             | 42   | <0.0001 |

603  
 604 **Table 2.** The time (days post infection, dpi) required for first detection and to reach the plateau  
 605 of numbers of mosquitoes infected, with disseminated infections, and infectious.

| temperature                       | 16°C | 20°C | 24°C | 28°C | 32°C | 34°C | 36°C | 38°C |
|-----------------------------------|------|------|------|------|------|------|------|------|
| time (dpi) to first detection of: |      |      |      |      |      |      |      |      |
| infection                         | 12   | 6    | 3    | 3    | 3    | 3    | 3    | 3    |
| dissemination                     | 12   | 15   | 6    | 3    | 3    | 3    | 3    | 3    |
| infectiousness                    |      | 21   | 15   | 9    | 6    | 6    | 6    | 3    |
| time (dpi) to reach plateau of:   |      |      |      |      |      |      |      |      |
| infection                         | 18   | 12   | 6    | 3    | 9    | 3    | 3    | 3    |
| dissemination                     | 18   | 21   | 15   | 15   | 9    | 6    | 6    | 3    |
| infectiousness                    |      | 21   | 18   | 15   | 12   | 9    | 6    | 3    |

606  
 607 **Table 3.** Results from Cox mixed-effects model examining the effects of temperature (16°C,  
 608 20°C, 24°C, 28°C, 32°C, 34°C, 36°C, 38°C), infection status (exposed or not exposed) and the  
 609 interaction on the daily probability of mosquito survival.

| effect                  | Chi-Square | d.f. | p-value |
|-------------------------|------------|------|---------|
| temperature             | 1138.226   | 7    | <0.0001 |
| infection               | 0.227      | 1    | 0.6338  |
| temperature x infection | 25.871     | 7    | 0.0005  |

610  
 29

## 611 **Figures**

612 **Fig 1. Temperature effect on the proportion of mosquitoes infected, with disseminated**  
613 **infections, and infectious.** The effect of eight different constant temperatures (16°C, 20°C,  
614 24°C, 28°C, 32°C, 34°C, 36°C, 38°C) on the proportion of mosquitoes infected (ZIKV positive  
615 bodies compared to total number of exposed), with disseminated infections (ZIKV positive heads  
616 compared to total number exposed), and infectious (ZIKV positive saliva compared to total  
617 number exposed). Results with no common letters were significantly different ( $p \leq 0.05$ ).

618  
619 **Fig 2. Days post-infection and the proportion of mosquitoes infected, with disseminated**  
620 **infections, and infectious.** The relationship between days post-infection (3, 6, 9, 12, 15, 18, 21)  
621 and the proportion of mosquitoes infected (A, ZIKV positive bodies), with disseminated  
622 infections (B, ZIKV positive legs and heads), and infectious (C, ZIKV positive saliva) out of the  
623 total mosquitoes exposed to ZIKV at eight different constant temperatures (16°C, 20°C, 24°C,  
624 28°C, 32°C, 34°C, 36°C, 38°C).

625  
626 **Fig 3. Temperature effect on the dissemination efficiency (A)** The effect of eight different  
627 constant temperatures (16°C, 20°C, 24°C, 28°C, 32°C, 34°C, 36°C, 38°C) and (B) days post-  
628 infection (3, 6, 9, 12, 15, 18, 21) on the dissemination efficiency (proportion of ZIKV positive  
629 saliva relative to positive bodies). Results with no common letters were significantly different ( $p$   
630  $\leq 0.05$ ).

631  
632 **Fig 4. Effect of temperature and estimated vector competence, extrinsic incubation rate**  
633 **and mosquito lifespan.** Trait thermal responses, fit from laboratory experimental data. Vector

634 competence (left), is the maximum proportion of virus-exposed mosquitoes with virus in their  
635 saliva, across temperatures and replicates. Extrinsic incubation rate (middle) is the inverse of the  
636 time required to reach half of the maximum proportion infectious ( $\text{days}^{-1}$ ) for each temperature  
637 and replicate. Lifespan is the average lifespan of mosquitoes in each temperature and replicate  
638 (days), shown in filled (virus-exposed) and open (sham-inoculated) points. Solid lines represent  
639 posterior means; dashed lines represent 95% credible intervals.

640

641 **Fig 5. Effect of temperature on  $R_0$ .** Effect of temperature on  $R_0$  (top). Solid line is the mean  
642 and dashed lines are the 95% credible intervals.

643

644 **Fig 6. Months of transmission suitability in the Americas.** The number of months of  
645 transmission suitability ( $R_0 > 0$ ) for a. ZIKV derived in this study, and b. Mordecai et al 2017,  
646 *Aedes aegypti* only, for median (posterior 50<sup>th</sup> percentile) models, and c. overlaid all (1-12  
647 months) and year-round (12 months) transmission suitability from a. (light blue, light purple) and  
648 b. (dark blue, dark purple), respectively.

649

650

651

652

653

Proportion of mosquitoes

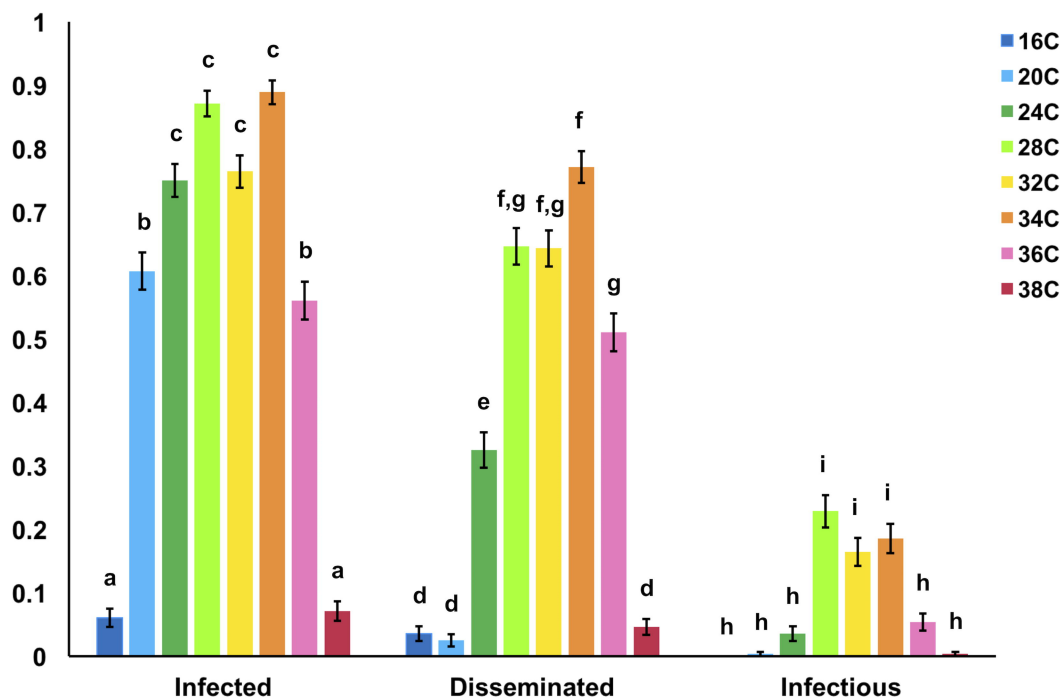



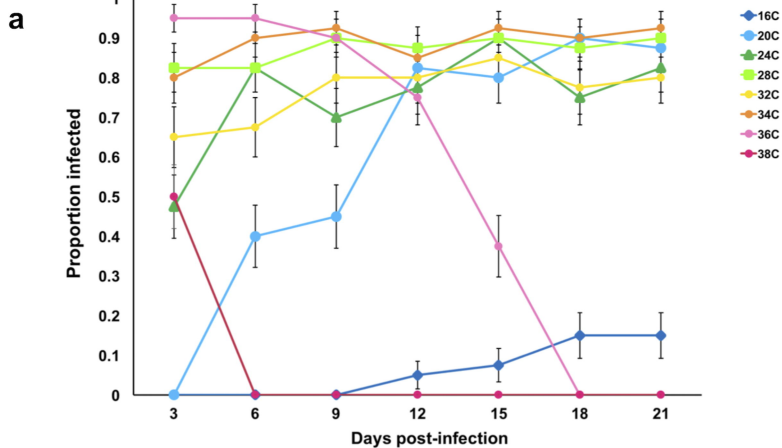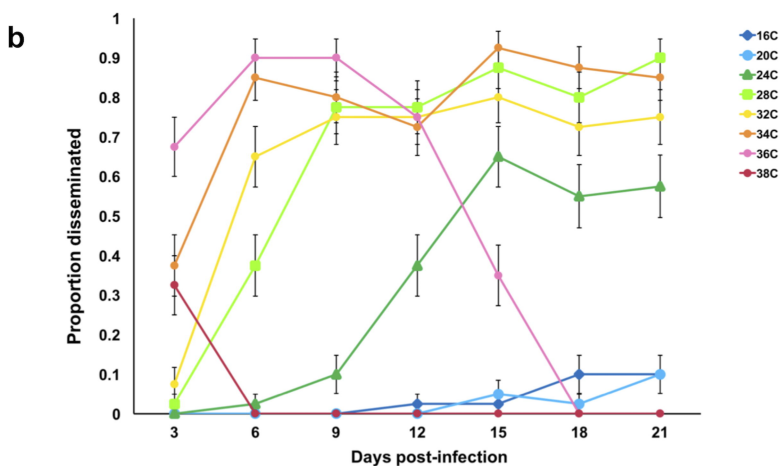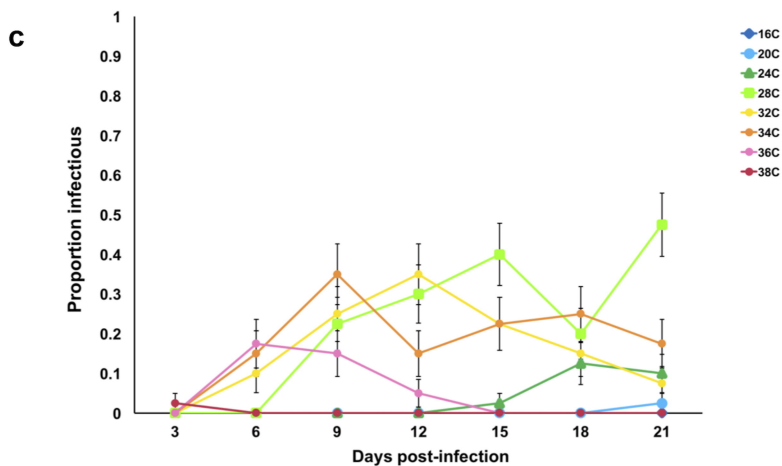

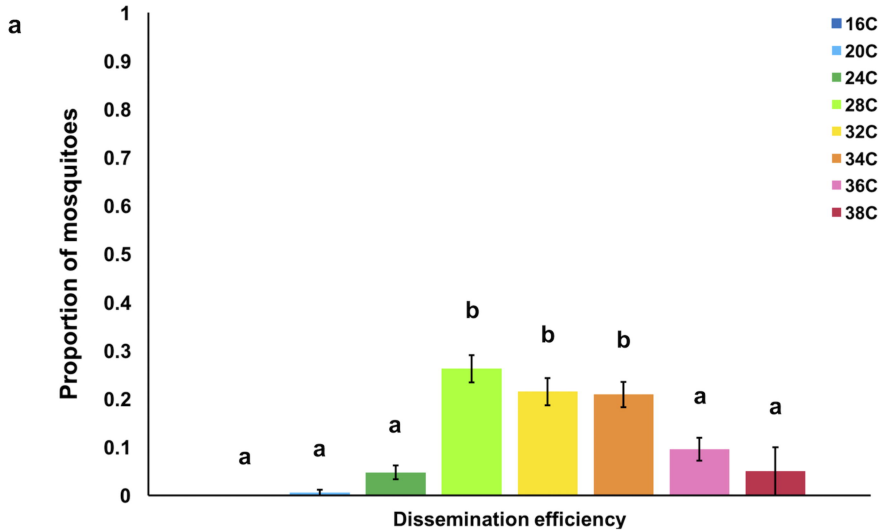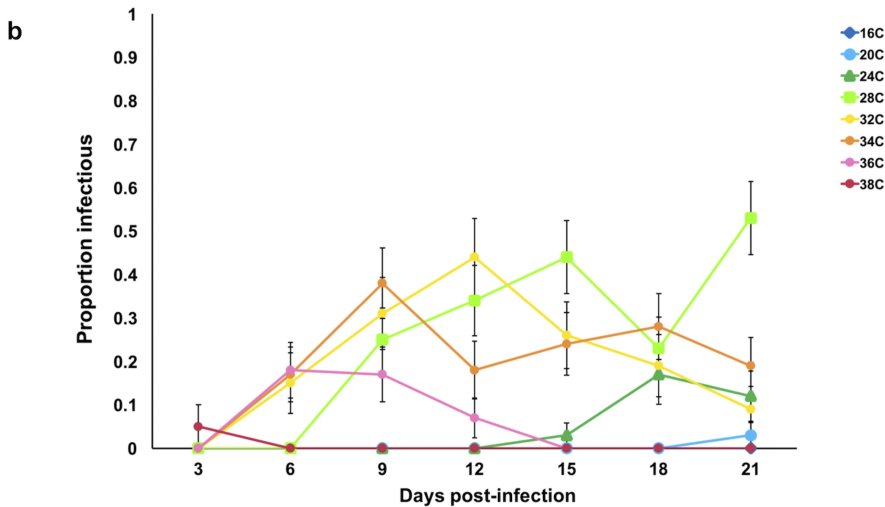

**Vector Competence**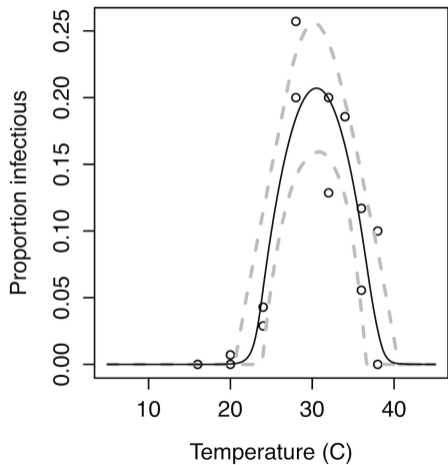**Extrinsic Incubation Rate**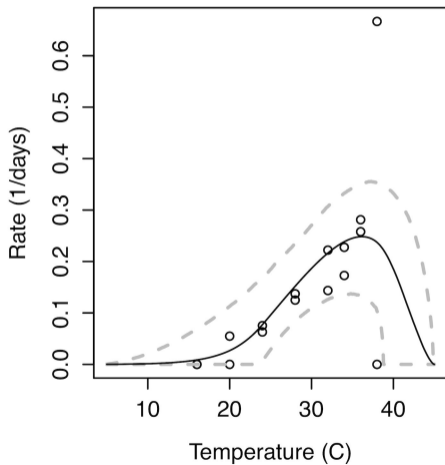**Lifespan**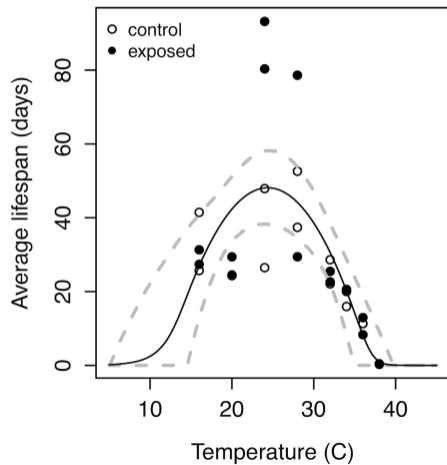

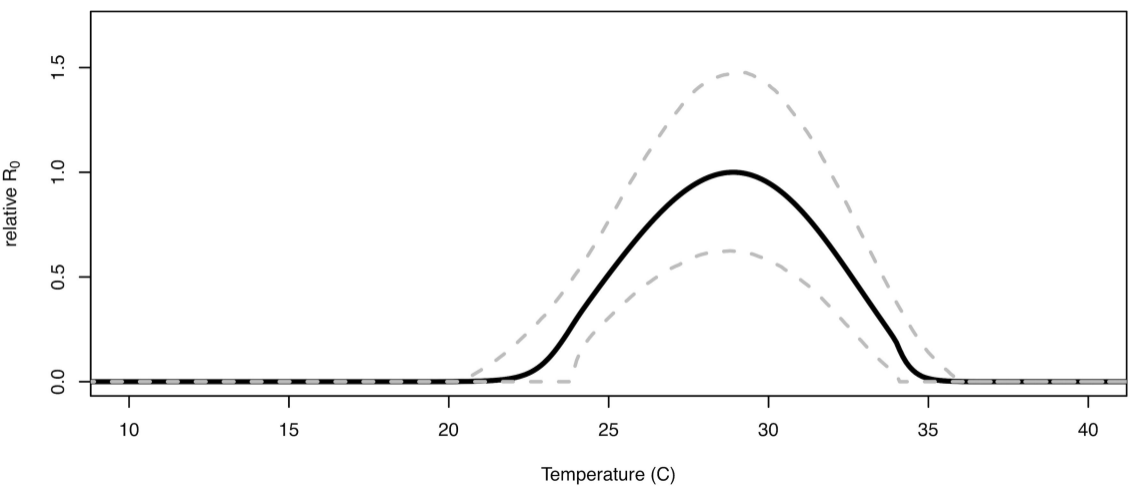

Months

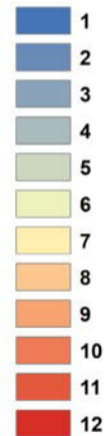

a

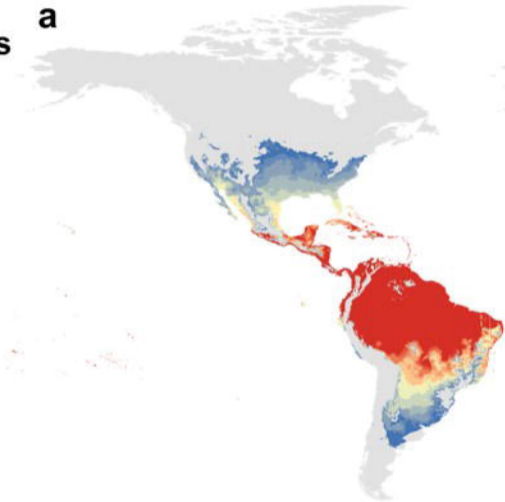

b

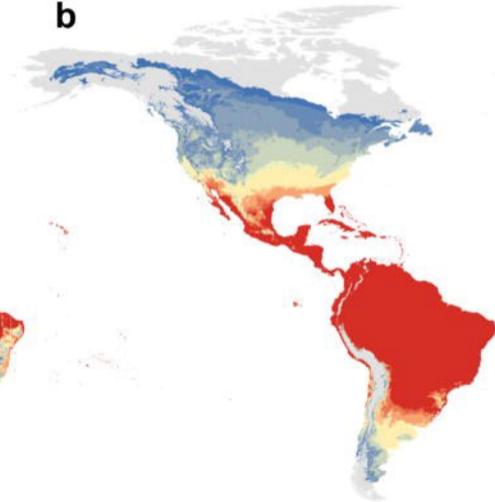

c

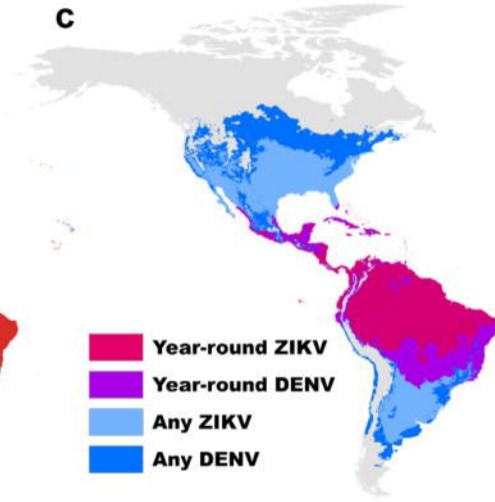

Year-round ZIKV  
Year-round DENV  
Any ZIKV  
Any DENV
